# Supplementary material for: ROS- and pH-Responsive Polydopamine Functionalized Ti3C2Tx MXene-Based Nanoparticles as Drug Delivery Nanocarriers with High Antibacterial Activity
Source: MDPI journal article supplement (doi:10.3390/nano12244392), 2022-12-09
Supplement: s1 [file s1]

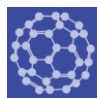

## Supplementary Materials

# ROS- and pH-Responsive Polydopamine Functionalized $\text{Ti}_3\text{C}_2\text{T}_x$ MXene-Based Nanoparticles as Drug Delivery Nanocarriers with High Antibacterial Activity

Wei-Jin Zhang <sup>1</sup>, Shuwei Li <sup>2</sup>, Veena Vijayan <sup>3,4</sup>, Jun Seok Lee <sup>1</sup>, Sung Soo Park <sup>5</sup>, Xiuguo Cui <sup>6</sup>, Ildoo Chung <sup>1</sup>, Jaejun Lee <sup>1</sup>, Suk-kyun Ahn <sup>1</sup>, Jung Rae Kim <sup>2</sup>, In-Kyu Park <sup>3,4</sup> and Chang-Sik Ha <sup>1,\*</sup>

<sup>1</sup> Department of Polymer Science and Engineering, School of Chemical Engineering, Pusan National University, Busan 46241, Republic of Korea

<sup>2</sup> School of Chemical Engineering, Pusan National University, Busan 46241, Republic of Korea

<sup>3</sup> Department of Biomedical Sciences, Chonnam National University Medical School, Gwangju 61469, Republic of Korea

<sup>4</sup> BioMedical Sciences Graduate Program (BMSGP), Chonnam National University, Hwasun 58128, Republic of Korea

<sup>5</sup> Division of Advanced Materials Engineering, Dong-Eui University, Busan 47340, Republic of Korea

<sup>6</sup> School of Material Science and Engineering, Beijing Institute of Petrochemical Technology, Beijing 102617, China

\* Correspondence: csha@pnu.edu

Thioglycolic acid was reacted with acetone to form a thioketal compound diacetoxyl thioketal.

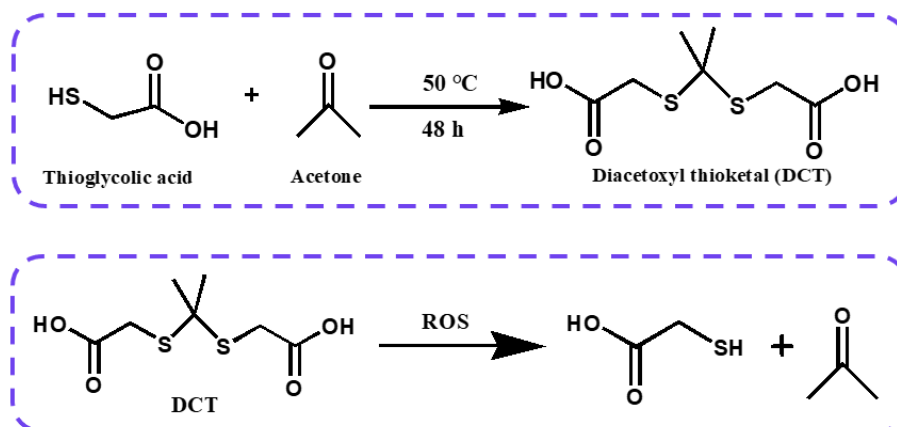

**Figure S1.** Synthesis of ROS-cleavable diacetoxyl thioketal (TK) linker.

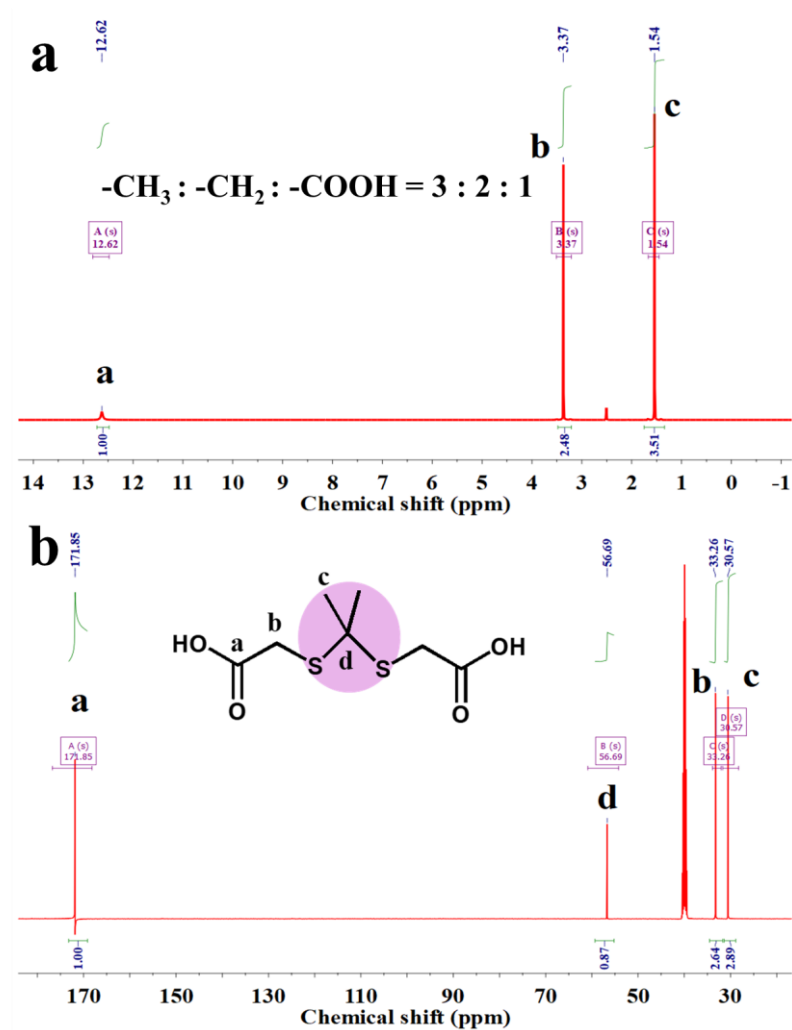

**Figure S2.** NMR spectra of TK ROS-cleavable linker in DMSO- $\text{d}_6$  (a)  $^1\text{H}$  and (b)  $^{13}\text{C}$ .

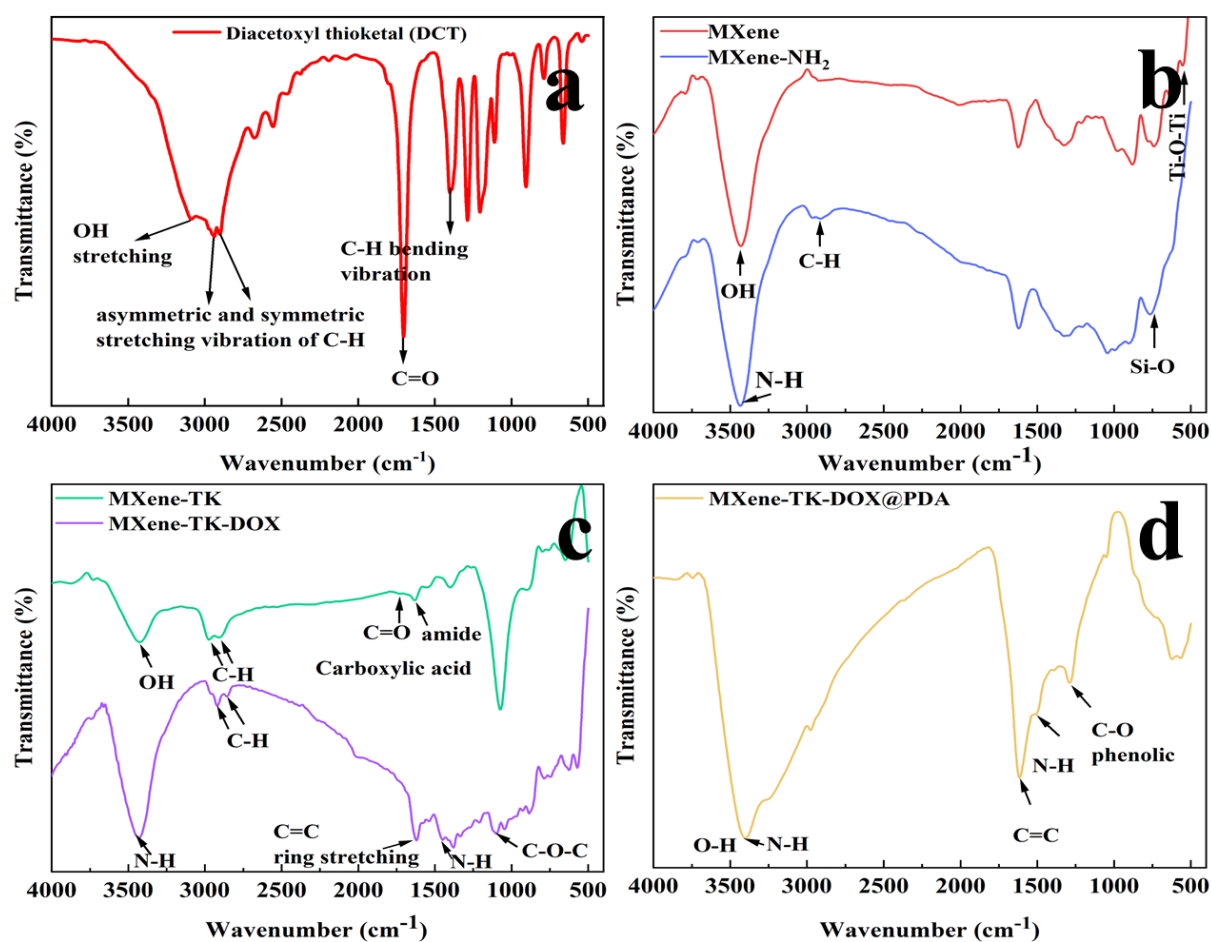

**Figure S3.** FTIR spectra analysis. (a) The ROS-cleavable TK linker, (b) MXene and MXene-NH<sub>2</sub> nanosheets, (c) MXene-TK and MXene-TK-DOX flaks, (d) MXene-TK-DOX@PDA nanoparticles.

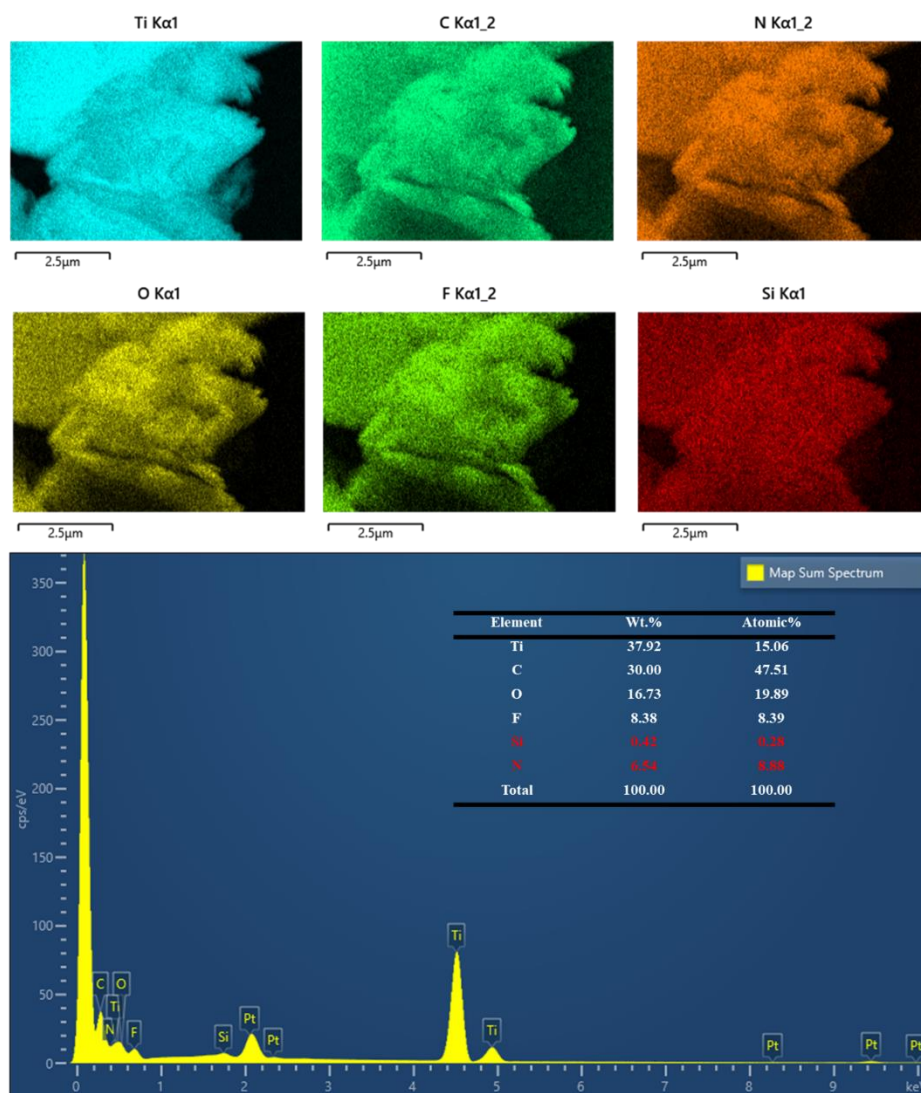

**Figure S4.** EDX (mapping) of MXene-NH<sub>2</sub> nanosheets.

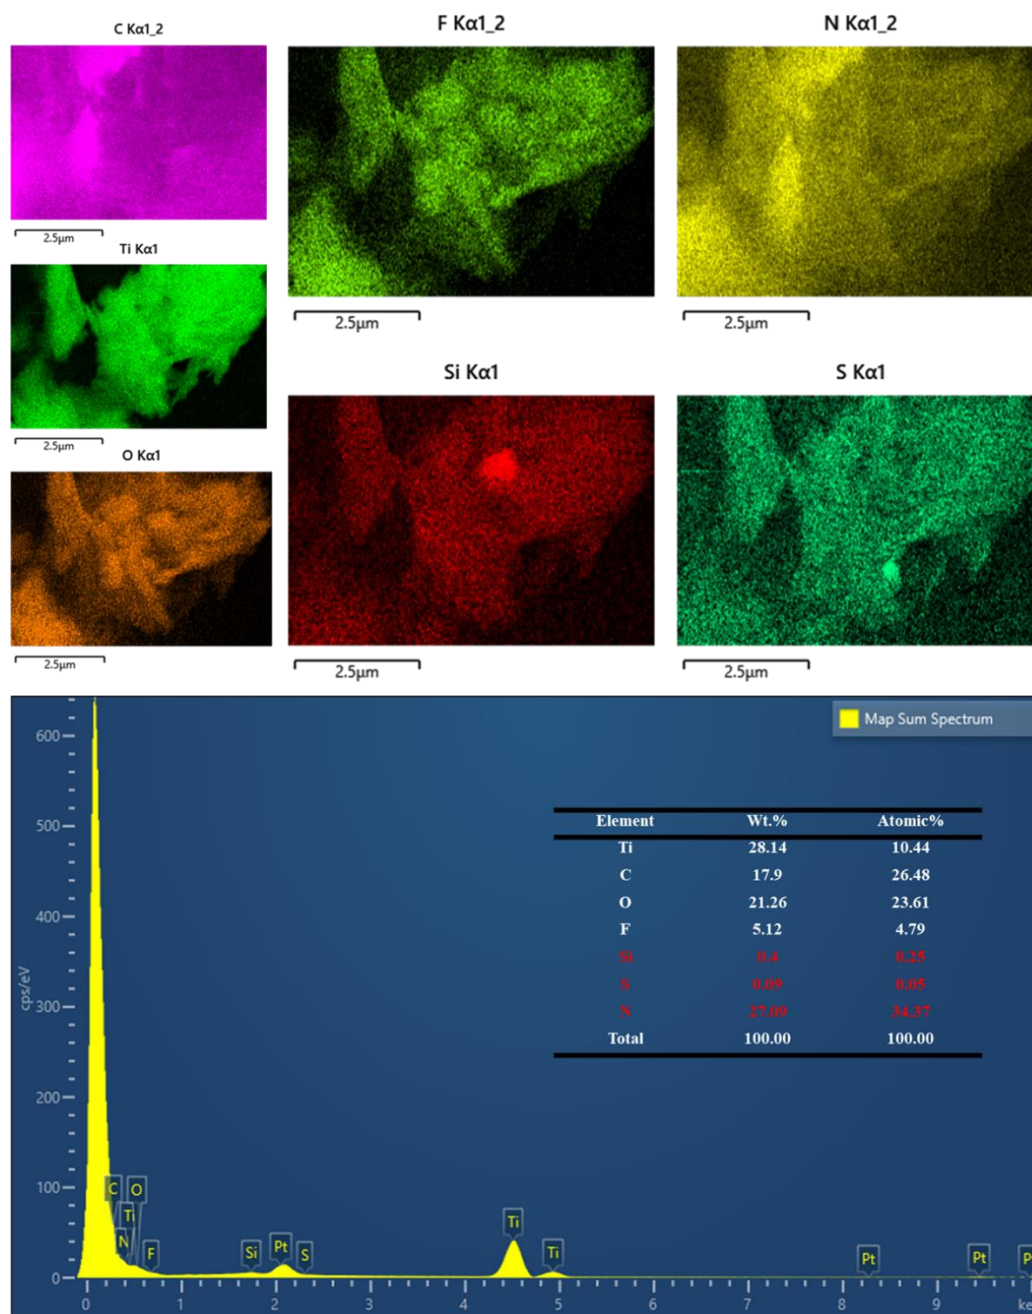

**Figure S5.** The EDX (mapping) of MXene-TK nanosheets.

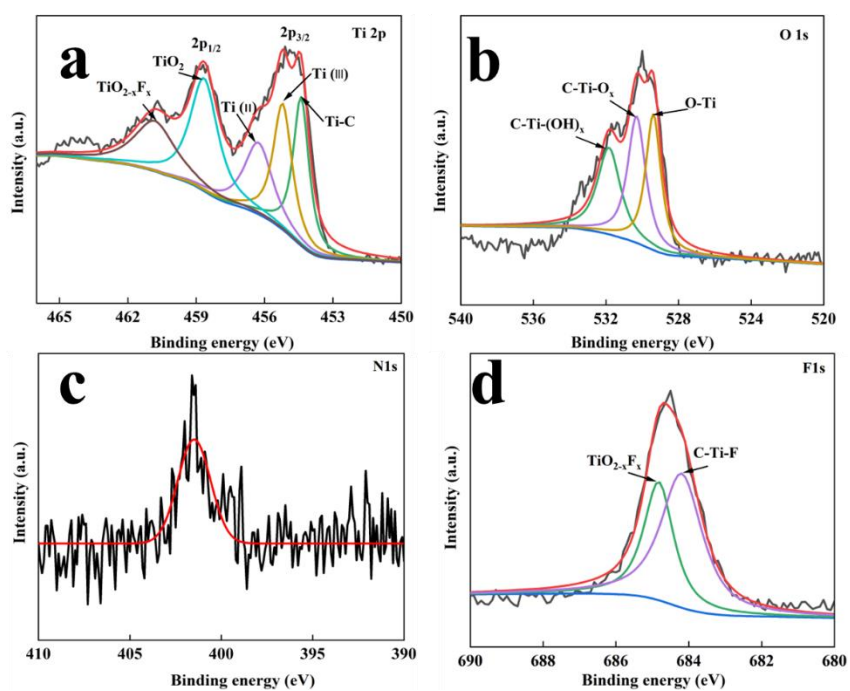

**Figure S6.** XPS spectrum of MXene nanosheets after delamination by TBAOH. (a) O1s, (b) Ti 2p, (c) F1s, and (d) N1s.

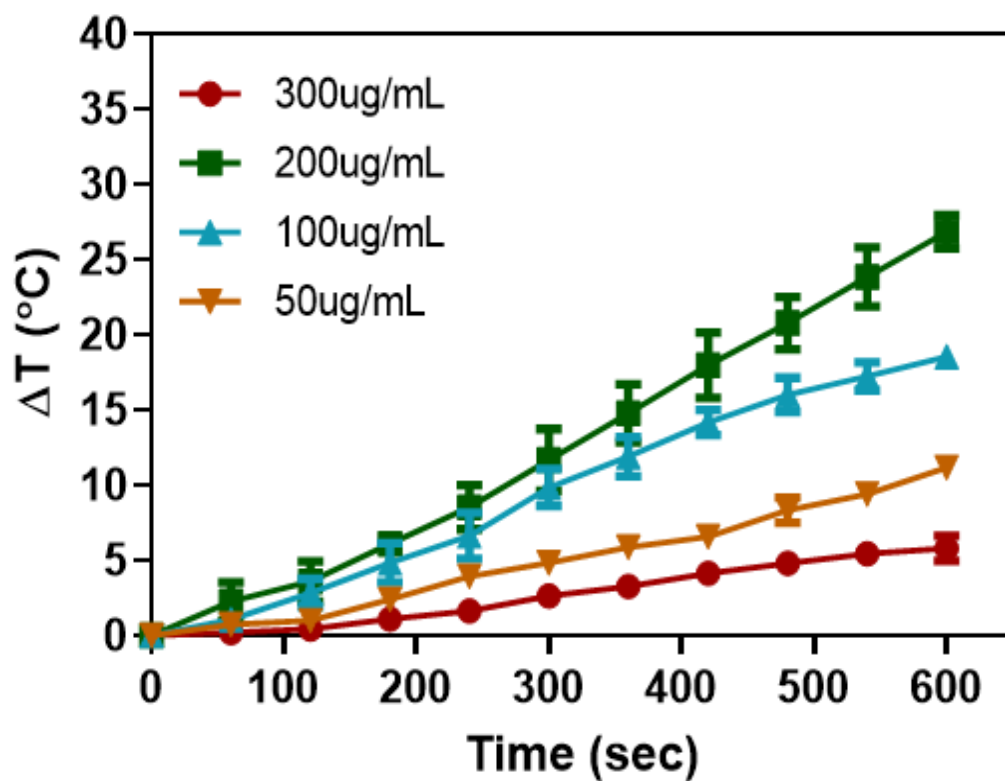

**Figure S7.** Photothermal-heating profile of MXene aqueous solution after 808 nm laser irradiation ( $2 \text{ W/cm}^2$ ) at elevated concentrations (50, 100, 200, and 300 ug/mL).

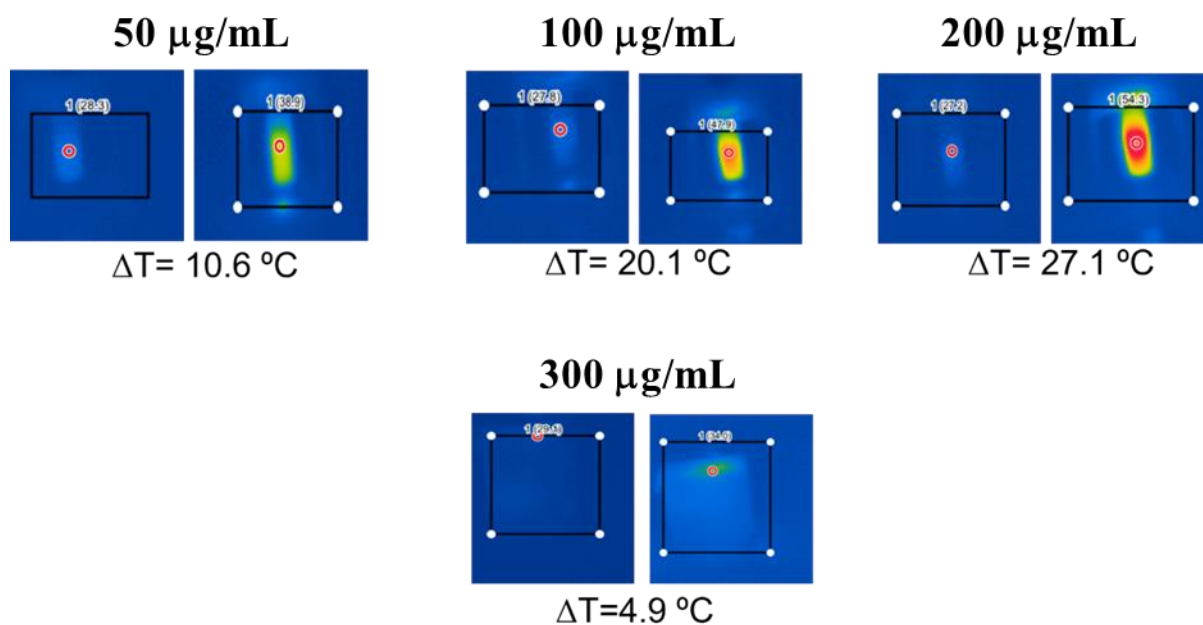

**Figure S8.** Infrared thermal images of MXene nanosheets irradiated with 808 nm laser (2 W/cm<sup>2</sup>) for 10 min at varied concentrations (50, 100, 200, and 300  $\mu\text{g/mL}$ ).



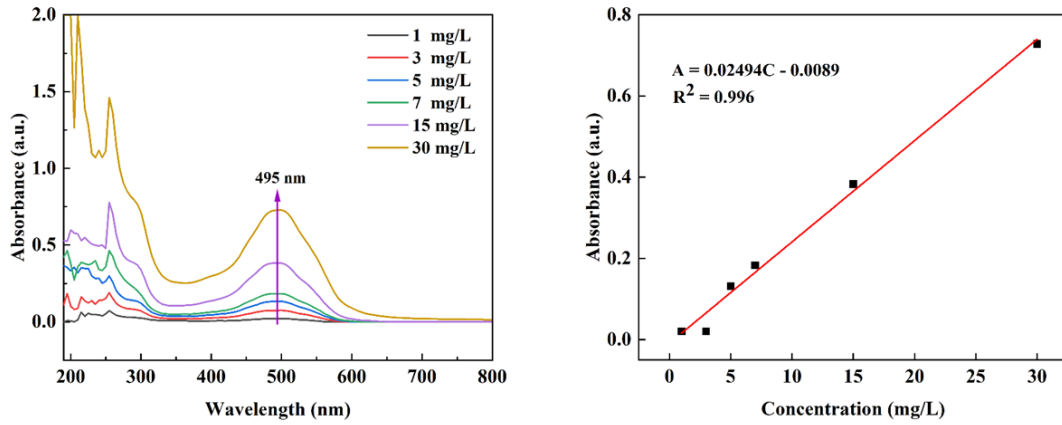

**Figure S9.** Calibration curve of doxorubicin in PBS solution.

**Table S1** In vitro doxorubicin release kinetics study for different formulations based on the Higuchi model.

| Sample Code      | Release Medium                         | Higuchi |       |
|------------------|----------------------------------------|---------|-------|
|                  |                                        | $K_h^*$ | $R^2$ |
| MXene-TK-DOX@PDA | pH 5.5                                 | 2.299   | 0.976 |
|                  | pH 7.4                                 | 0.071   | 0.879 |
|                  | pH 7.4 + H <sub>2</sub> O <sub>2</sub> | 5.993   | 0.995 |
|                  | pH 5.5 + H <sub>2</sub> O <sub>2</sub> | 7.931   | 0.993 |

$K_h^*$  represents the release rate constant, and  $R^2$  represents the correlation coefficient.

The general simplified Higuchi model equation is expressed as follows.

$$\text{Higuchi: } M_t = k_h t^{1/2} \quad (1)$$

Where  $M_t$  is the release rate at time  $t$  and  $k_h$  is the rate constant.
